# Supplementary material for: Characterization of Plasmodium Lactate Dehydrogenase and Histidine-Rich Protein 2 Clearance Patterns via Rapid On-Bead Detection from a Single Dried Blood Spot
Source: PubMed Central journal article supplement (PMC5953395; doi:10.4269/ajtmh.17-0996), 2018-03-19
Supplement: tpmd170996.SD1.pdf [file tpmd170996.SD1.pdf]

SUPPLEMENTAL TEXT 1

**Plate ELISA for *Plasmodium* lactate dehydrogenase standardization in in-house D6 culture.** First, 100  $\mu$ L of 2  $\mu$ g/mL 19g7 in PBS was placed in a 96-well plate and incubated for 1 hour. The plate was washed three times with 250  $\mu$ L of 1 $\times$  PBS with 0.1% Tween-20 (PBST). Next, 250  $\mu$ L of 15% nonfat dried milk in PBST was added to each well and the plate was incubated for 2 hours. After washing three times with PBST, 100  $\mu$ L of standard *rcPf*LDH and in-house culture diluted in PBST with 0.1% nonfat dried milk were placed on the plate and incubated for 2 hours. The plate was then washed five times with PBST, and 100  $\mu$ L of 2  $\mu$ g/mL 1201: HRPx in PBST with 0.5% nonfat dried milk was added to each well and the plate was incubated for 1 hour. After washing five times with PBST, 100  $\mu$ L of TMB One solution was added to the wells, the plate was incubated for 15 minutes, and the reaction was quenched with 2M H<sub>2</sub>SO<sub>4</sub>. Absorbance was measured at 450 nm.

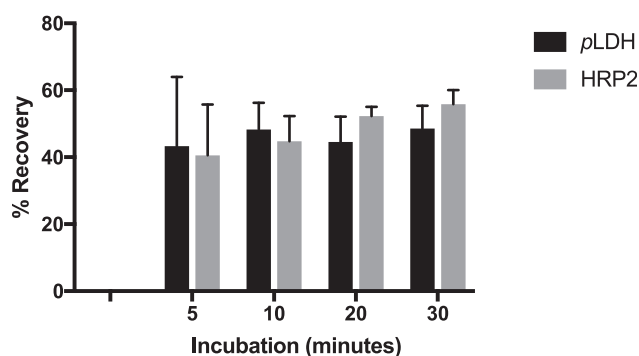

SUPPLEMENTAL FIGURE 1. Recovery of *Plasmodium* lactate dehydrogenase (pLDH) and histidine-rich protein 2 (HRP2) as a function of dried blood spot incubation time in PBS with 0.1% Tween-20. No significant differences were found between extraction efficiencies of pLDH and HRP2, and 10 minutes was chosen as the optimum incubation time.

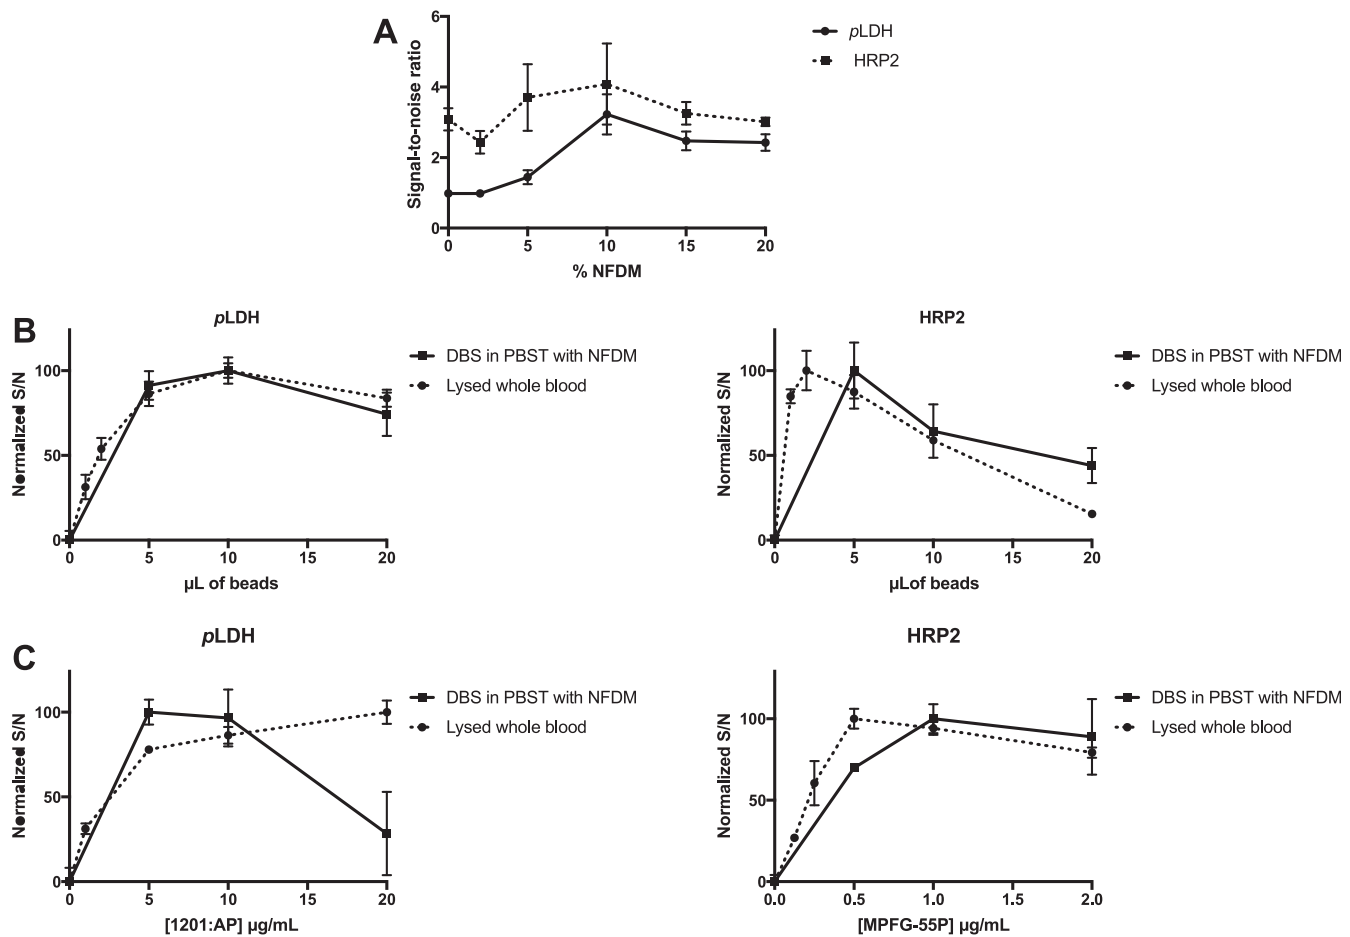

SUPPLEMENTAL FIGURE 2. Optimization of (A) nonfat dried milk concentration in blocking solution, (B) antibody-functionalized magnetic bead volume for *Plasmodium* lactate dehydrogenase (pLDH) (left) and histidine-rich protein 2 (HRP2) (right), and (C) detection antibody concentration for LDH (left) and HRP2 (right).

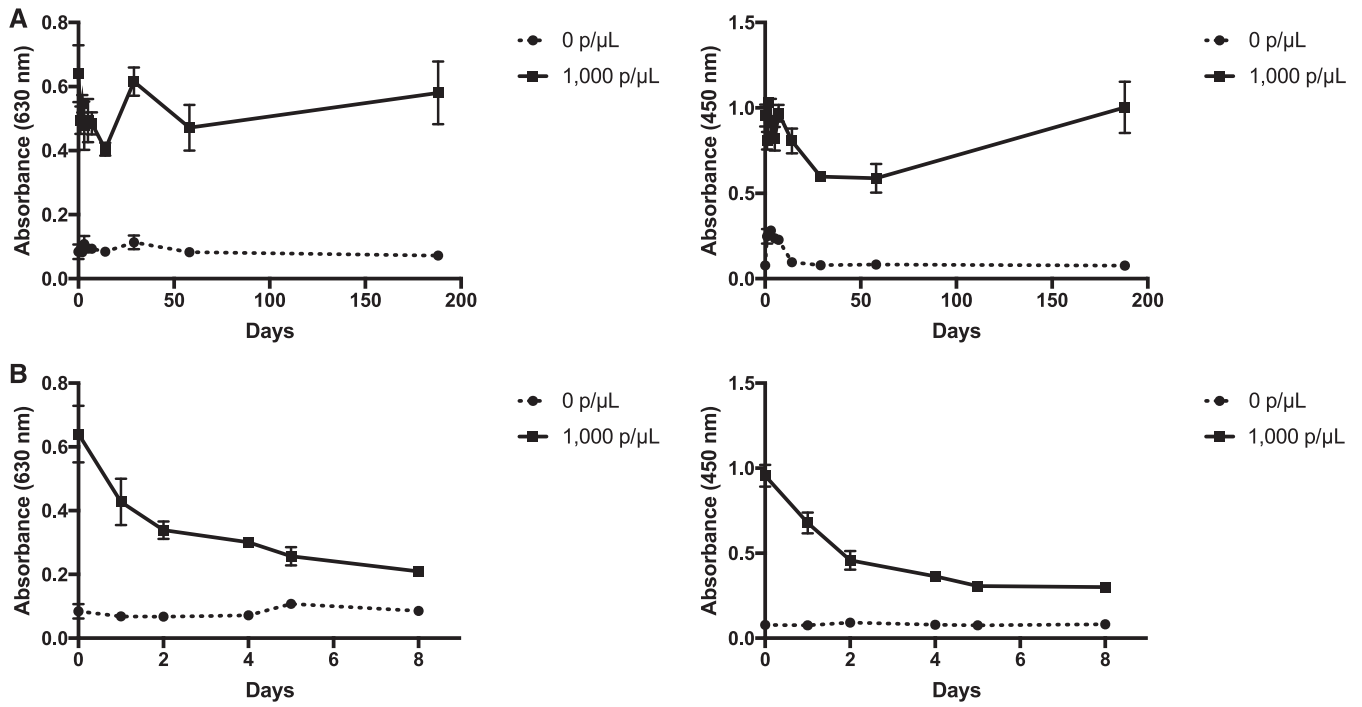

SUPPLEMENTAL FIGURE 3. Dried blood spot (DBS) storage time at (A) -20°C and (B) room temperature vs. DBS simultaneous capture and sequential detection ELISA signal for *Plasmodium* lactate dehydrogenase (left) and histidine-rich protein 2 (right).

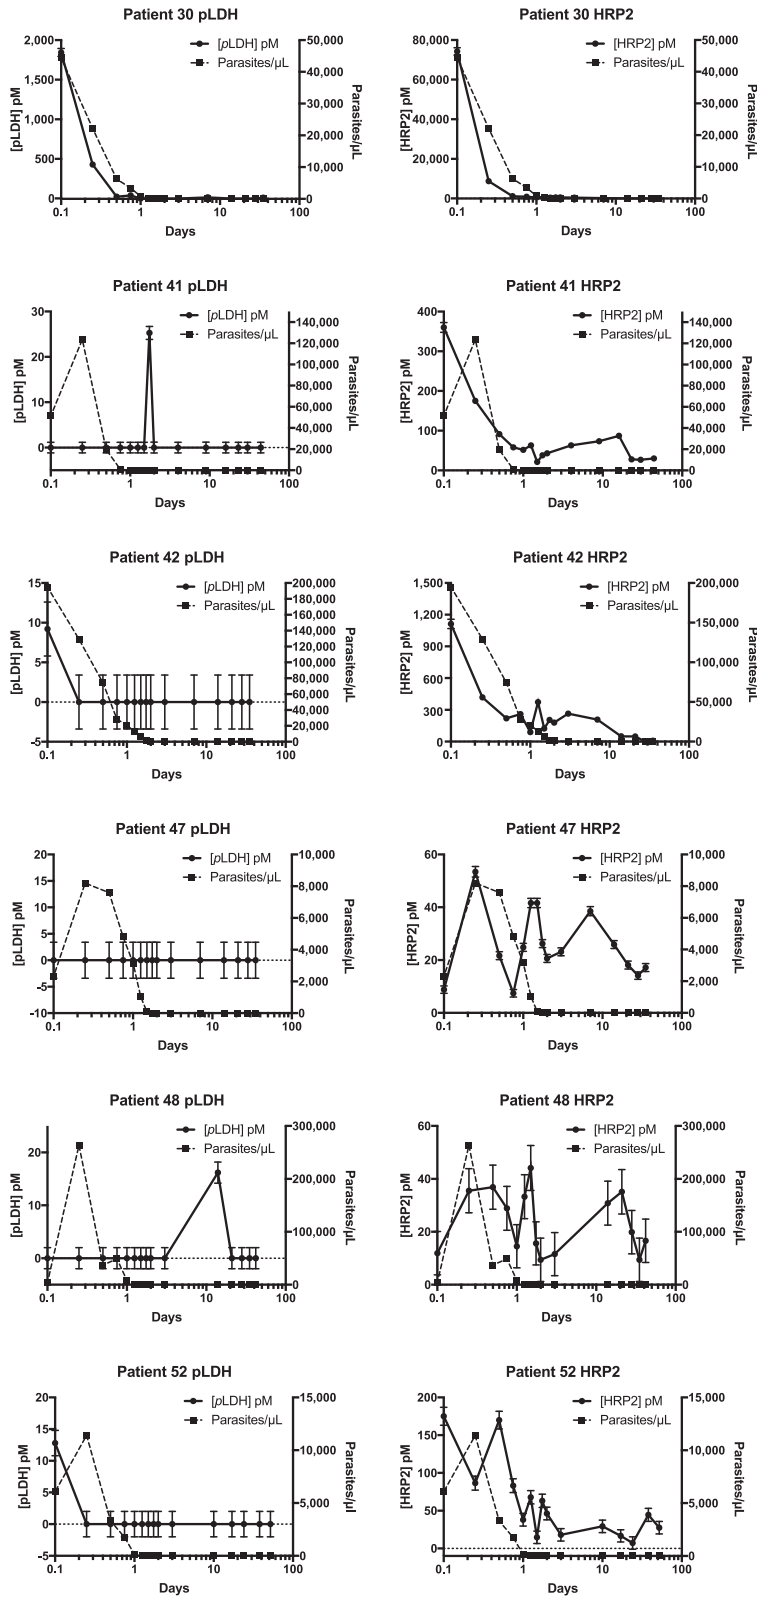

SUPPLEMENTAL FIGURE 4. Biomarker clearance patterns for individual patients from rural Zambia.

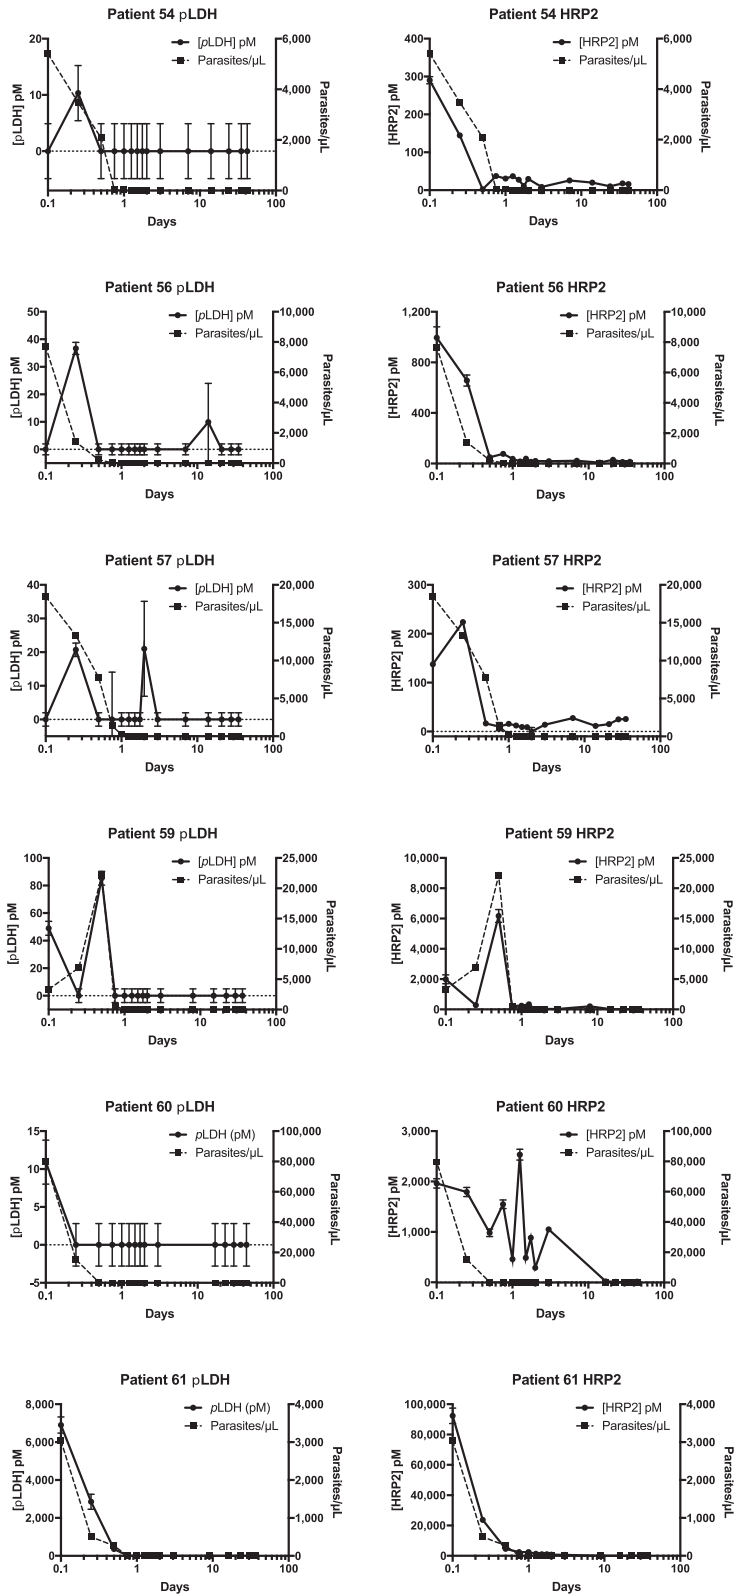

SUPPLEMENTAL FIGURE 4. (Continued)

SUPPLEMENTAL TABLE 1  
Patient biomarker concentrations over time

| Patient ID | Time (days) | Parasites/ $\mu$ L | $\rho$ LDH (pM) |       | HRP2 (pM) |       |
|------------|-------------|--------------------|-----------------|-------|-----------|-------|
|            |             |                    | Average         | Error | Average   | Error |
| Patient 29 | 0           | 82,880             | 2,350           | 70    | 16,200    | 900   |
|            | 0.25        | 150,189            | 1,980           | 70    | 14,700    | 900   |
|            | 0.5         | 57,258             | 520             | 13    | 9,800     | 600   |
|            | 0.75        | 1,680              | 49.6            | 2.0   | 9,500     | 600   |
|            | 1           | 400                | 42.0            | 1.9   | 10,400    | 600   |
|            | 1.25        | 112                | 26.8            | 1.7   | 4,600     | 300   |
|            | 1.5         | 0                  | 50.0            | 2.0   | 5,600     | 300   |
|            | 1.75        | 0                  | 35.9            | 1.8   | 10,900    | 600   |
|            | 2           | 0                  | 22.8            | 1.6   | 8,688.4   | 500   |
|            | 3           | 0                  | 13              | 1.6   | 12,200    | 709.4 |
|            | 14          | 0                  | 0               | 1.5   | 0         | 8     |
|            | 21          | 0                  | 0               | 1.5   | 0         | 8     |
|            | 28          | 0                  | 16.3            | 1.6   | 0         | 8     |
|            | 35          | 0                  | 0               | 1.5   | 0         | 8     |
| 42         | 0           | 0                  | 11.6            | 1.6   | 0         | 8     |
| Patient 30 | 0           | 44,400             | 1,840           | 50    | 74,000    | 2,000 |
|            | 0.25        | 22,194             | 428             | 14    | 8,800     | 200   |
|            | 0.5         | 6,280              | 22.3            | 1.4   | 1,180     | 40    |
|            | 0.75        | 3,400              | 38.8            | 1.8   | 890       | 30    |
|            | 1           | 800                | 0               | 1.2   | 564       | 19    |
|            | 1.25        | 240                | 0               | 1.2   | 700       | 20    |
|            | 1.5         | 112                | 0               | 1.2   | 446       | 15    |
|            | 1.75        | 0                  | 0               | 1.2   | 562       | 19    |
|            | 2           | 0                  | 0               | 1.2   | 534       | 18    |
|            | 3           | 0                  | 0               | 1.2   | 442       | 15    |
|            | 7           | 0                  | 14.7            | 1.3   | 134       | 5     |
|            | 14          | 0                  | 0               | 1.2   | 14.9      | 2.0   |
|            | 21          | 0                  | 0               | 1.2   | 0         | 2.3   |
|            | 28          | 0                  | 0               | 1.2   | 0         | 2.3   |
| 35         | 0           | 10.1               | 1.2             | 22.9  | 2.4       |       |
| Patient 41 | 0           | 51,480             | 0               | 1.2   | 360       | 12    |
|            | 0.25        | 123,579            | 0               | 1.2   | 175       | 6     |
|            | 0.5         | 19,440             | 0               | 1.2   | 92        | 4     |
|            | 0.75        | 960                | 0               | 1.2   | 58        | 3     |
|            | 1           | 112                | 0               | 1.2   | 52        | 3     |
|            | 1.25        | 0                  | 0               | 1.2   | 63        | 3     |
|            | 1.5         | 0                  | 0               | 1.2   | 21.6      | 2.4   |
|            | 1.75        | 0                  | 25.3            | 1.4   | 38        | 3     |
|            | 2           | 0                  | 0               | 1.2   | 43        | 3     |
|            | 4           | 0                  | 0               | 1.2   | 63        | 3     |
|            | 9           | 0                  | 0               | 1.2   | 73        | 3     |
|            | 16          | 0                  | 0               | 1.2   | 87        | 4     |
|            | 23          | 0                  | 0               | 1.2   | 27        | 3     |
|            | 30          | 0                  | 0               | 1.2   | 26        | 3     |
| 44         | 0           | 0                  | 1.2             | 30    | 3         |       |
| Patient 42 | 0           | 194,840            | 9               | 3     | 1,110     | 40    |
|            | 0.25        | 129,298            | 0               | 3     | 417       | 11    |
|            | 0.5         | 74,267             | 0               | 3     | 220       | 6     |
|            | 0.75        | 28,480             | 0               | 3     | 260       | 7     |
|            | 1           | 20,840             | 0               | 3     | 89        | 3     |
|            | 1.25        | 12,960             | 0               | 3     | 373       | 10    |
|            | 1.5         | 6,800              | 0               | 3     | 123       | 4     |
|            | 1.75        | 1,720              | 0               | 3     | 204       | 6     |
|            | 2           | 720                | 0               | 3     | 180       | 5     |
|            | 3           | 0                  | 0               | 3     | 264       | 7     |
|            | 7           | 0                  | 0               | 3     | 209       | 6     |
|            | 14          | 0                  | 0               | 3     | 49.2      | 1.9   |
|            | 21          | 0                  | 0               | 3     | 47.8      | 1.9   |
|            | 28          | 0                  | 0               | 3     | 0         | 1.4   |
| 35         | 0           | 0                  | 3               | 7.7   | 1.4       |       |
| Patient 47 | 0           | 2,320              | 0               | 3     | 8.8       | 1.4   |
|            | 0.25        | 8,200              | 0               | 3     | 53.4      | 2.0   |
|            | 0.5         | 7,600              | 0               | 3     | 21.7      | 1.5   |
|            | 0.75        | 4,800              | 0               | 3     | 7.4       | 1.4   |
|            | 1           | 3,160              | 0               | 3     | 24.8      | 1.5   |
|            | 1.25        | 1,040              | 0               | 3     | 41.6      | 1.8   |
|            | 1.5         | 80                 | 0               | 3     | 41.6      | 1.8   |
| 1.75       | 0           | 0                  | 3               | 26.2  | 1.5       |       |

(continued)

SUPPLEMENTAL TABLE 1  
Continued

| Patient ID | Time (days) | Parasites/ $\mu$ L | $\rho$ LDH (pM) |       | HRP2 (pM) |       |    |
|------------|-------------|--------------------|-----------------|-------|-----------|-------|----|
|            |             |                    | Average         | Error | Average   | Error |    |
| Patient 48 | 2           | 0                  | 0               | 3     | 20.6      | 1.5   |    |
|            | 3           | 0                  | 0               | 3     | 23.1      | 1.5   |    |
|            | 7           | 0                  | 0               | 3     | 38.5      | 1.7   |    |
|            | 14          | 0                  | 0               | 3     | 25.9      | 1.5   |    |
|            | 21          | 0                  | 0               | 3     | 18.1      | 1.5   |    |
|            | 28          | 0                  | 0               | 3     | 14.1      | 1.4   |    |
|            | 35          | 0                  | 0               | 3     | 17.2      | 1.5   |    |
|            | 0           | 4,480              | 0               | 2.0   | 12        | 8     |    |
|            | 0.25        | 263,530            | 0               | 2.0   | 36        | 8     |    |
|            | 0.5         | 37,212             | 0               | 2.0   | 37        | 8     |    |
|            | 0.75        | 48,989             | 0               | 2.0   | 29        | 8     |    |
|            | 1           | 8,080              | 0               | 2.0   | 15        | 8     |    |
|            | 1.25        | 800                | 0               | 2.0   | 33        | 8     |    |
|            | 1.5         | 0                  | 0               | 2.0   | 44        | 8     |    |
|            | 1.75        | 0                  | 0               | 2.0   | 16        | 8     |    |
|            | 2           | 0                  | 0               | 2.0   | 9         | 8     |    |
|            | 3           | 0                  | 0               | 2.0   | 12        | 8     |    |
| 14         | 0           | 16.2               | 2.0             | 31    | 8         |       |    |
| 21         | 0           | 0                  | 2.0             | 35    | 8         |       |    |
| 28         | 0           | 0                  | 2.0             | 20    | 8         |       |    |
| 35         | 0           | 0                  | 2.0             | 9     | 8         |       |    |
| 42         | 0           | 0                  | 2.0             | 17    | 8         |       |    |
| Patient 52 | 0           | 6,080              | 12.8            | 2.0   | 175       | 12    |    |
|            | 0.25        | 11,400             | 0               | 2.0   | 87        | 9     |    |
|            | 0.5         | 3,320              | 0               | 2.0   | 170       | 13    |    |
|            | 0.75        | 1,760              | 0               | 2.0   | 83        | 9     |    |
|            | 1           | 160                | 0               | 2.0   | 38        | 8     |    |
|            | 1.25        | 0                  | 0               | 2.0   | 68        | 8     |    |
|            | 1.5         | 0                  | 0               | 2.0   | 15        | 8     |    |
|            | 1.75        | 0                  | 0               | 2.0   | 63        | 8     |    |
|            | 2           | 0                  | 0               | 2.0   | 46        | 8     |    |
|            | 3           | 0                  | 0               | 2.0   | 18        | 8     |    |
|            | 10          | 0                  | 0               | 2.0   | 29        | 8     |    |
|            | 17          | 0                  | 0               | 2.0   | 17        | 8     |    |
|            | 24          | 0                  | 0               | 2.0   | 7         | 8     |    |
|            | 38          | 0                  | 0               | 2.0   | 45        | 8     |    |
|            | 52          | 0                  | 0               | 2.0   | 28        | 8     |    |
|            | Patient 54  | 0                  | 5,400           | 0     | 5         | 290   | 9  |
|            |             | 0.25               | 3,480           | 10    | 5         | 145   | 5  |
| 0.5        |             | 2,080              | 0               | 5     | 0         | 0.9   |    |
| 0.75       |             | 32                 | 0               | 5     | 37.3      | 1.5   |    |
| 1          |             | 32                 | 0               | 5     | 30.6      | 1.3   |    |
| 1.25       |             | 0                  | 0               | 5     | 36.9      | 1.5   |    |
| 1.5        |             | 0                  | 0               | 5     | 27.5      | 1.3   |    |
| 1.75       |             | 0                  | 0               | 5     | 10.8      | 1.0   |    |
| 2          |             | 0                  | 0               | 5     | 29.5      | 1.3   |    |
| 3          |             | 0                  | 0               | 5     | 8.4       | 0.9   |    |
| 7          |             | 0                  | 0               | 5     | 25.7      | 1.2   |    |
| 14         |             | 0                  | 0               | 5     | 19.7      | 1.1   |    |
| 24         |             | 0                  | 0               | 5     | 10.2      | 1.0   |    |
| 35         |             | 0                  | 0               | 5     | 17.9      | 1.1   |    |
| 42         |             | 0                  | 0               | 5     | 15.9      | 1.0   |    |
| Patient 55 |             | 0                  | 15,040          | 13    | 5         | 790   | 40 |
|            |             | 0.25               | 11,160          | 72    | 6         | 2,130 | 90 |
|            | 0.5         | 9,960              | 72              | 6     | 1,710     | 80    |    |
|            | 0.75        | 800                | 0               | 5     | 237       | 7     |    |
|            | 1           | 0                  | 0               | 5     | 107       | 4     |    |
|            | 1.25        | 0                  | 38              | 5     | 162       | 5     |    |
|            | 1.5         | 0                  | 0               | 5     | 171       | 5     |    |
|            | 1.75        | 0                  | 0               | 5     | 12.8      | 1.0   |    |
|            | 2           | 0                  | 0               | 5     | 28.2      | 1.3   |    |
|            | 3           | 0                  | 0               | 5     | 24.0      | 1.2   |    |
|            | 7           | 0                  | 0               | 5     | 20.9      | 1.1   |    |
|            | 14          | 0                  | 0               | 5     | 15.7      | 1.0   |    |
|            | 21          | 0                  | 0               | 5     | 11.9      | 1.0   |    |
|            | 28          | 0                  | 0               | 5     | 23.7      | 1.2   |    |
|            | 35          | 0                  | 0               | 5     | 11.0      | 1.0   |    |
|            | Patient 56  | 0                  | 7,680           | 0     | 2.0       | 1,000 | 90 |

(continued)

SUPPLEMENTAL TABLE 1

Continued

| Patient ID | Time (days) | Parasites/ $\mu$ L | $\rho$ LDH (pM) |       | HRP2 (pM) |       |     |
|------------|-------------|--------------------|-----------------|-------|-----------|-------|-----|
|            |             |                    | Average         | Error | Average   | Error |     |
| Patient 57 | 0.25        | 1,400              | 36.7            | 2.2   | 660       | 40    |     |
|            | 0.5         | 224                | 0               | 2.0   | 49.0      | 1.3   |     |
|            | 0.75        | 32                 | 0               | 2.0   | 76.5      | 2.0   |     |
|            | 1           | 0                  | 0               | 2.0   | 37.9      | 1.0   |     |
|            | 1.25        | 0                  | 0               | 2.0   | 16.6      | 0.5   |     |
|            | 1.5         | 0                  | 0               | 2.0   | 38.1      | 1.0   |     |
|            | 1.75        | 0                  | 0               | 2.0   | 13.7      | 0.4   |     |
|            | 2           | 0                  | 0               | 2.0   | 20.6      | 0.6   |     |
|            | 3           | 0                  | 0               | 2.0   | 18.8      | 0.5   |     |
|            | 7           | 0                  | 0               | 2.0   | 22.6      | 0.6   |     |
|            | 14          | 0                  | 10              | 14    | 8         | 8     |     |
|            | 21          | 0                  | 0               | 2.0   | 29.5      | 0.8   |     |
|            | 28          | 0                  | 0               | 2.0   | 12.5      | 0.4   |     |
|            | 35          | 0                  | 0               | 2.0   | 13.5      | 0.4   |     |
|            | 0           | 18,440             | 0               | 2.0   | 138       | 4     |     |
|            | 0.25        | 13,320             | 20.7            | 2.0   | 224       | 6     |     |
|            | 0.5         | 7,760              | 0               | 2.0   | 16.6      | 0.5   |     |
| 0.75       | 1,360       | 0                  | 14              | 10    | 8         |       |     |
| 1          | 240         | 0                  | 2.0             | 15.7  | 0.4       |       |     |
| 1.25       | 0           | 0                  | 2.0             | 12.3  | 0.4       |       |     |
| 1.5        | 0           | 0                  | 2.0             | 9.2   | 0.3       |       |     |
| 1.75       | 0           | 0                  | 2.0             | 9     | 0.3       |       |     |
| 2          | 0           | 21                 | 14              | 0     | 8         |       |     |
| 3          | 0           | 0                  | 2.0             | 13.9  | 0.4       |       |     |
| 7          | 0           | 0                  | 2.0             | 27.7  | 0.8       |       |     |
| 14         | 0           | 0                  | 2.0             | 11.7  | 0.3       |       |     |
| 21         | 0           | 0                  | 2.0             | 15.1  | 0.4       |       |     |
| 28         | 0           | 0                  | 2.0             | 24.9  | 0.7       |       |     |
| 35         | 0           | 0                  | 2.0             | 25.5  | 0.7       |       |     |
| Patient 58 | 0           | 32,360             | 9               | 5     | 3,200     | 300   |     |
|            | 0.25        | 21,720             | 30              | 5     | 2,900     | 300   |     |
|            | 0.5         | 4,520              | 0               | 5     | 266       | 4     |     |
|            | 0.75        | 3,920              | 10              | 5     | 3,500     | 300   |     |
|            | 1           | 480                | 0               | 5     | 3,900     | 300   |     |
|            | 1.25        | 112                | 10              | 5     | 3,900     | 300   |     |
|            | 1.5         | 0                  | 0               | 5     | 182       | 3     |     |
|            | 1.75        | 0                  | 0               | 5     | 77        | 3     |     |
|            | 2           | 0                  | 0               | 5     | 166       | 3     |     |
|            | 3           | 0                  | 0               | 5     | 201       | 3     |     |
|            | 8           | 0                  | 0               | 5     | 910       | 70    |     |
|            | 15          | 0                  | 0               | 5     | 18        | 3     |     |
|            | 22          | 0                  | 0               | 5     | 23        | 2.0   |     |
|            | 29          | 0                  | 0               | 5     | 33        | 2.0   |     |
|            | 36          | 0                  | 0               | 5     | 54        | 2.0   |     |
|            | Patient 59  | 0                  | 3,320           | 49    | 5         | 1,100 | 300 |
|            |             | 0.25               | 6,880           | 0     | 5         | 283   | 4   |
| 0.5        |             | 22,120             | 85              | 5     | 5,300     | 400   |     |
| 0.75       |             | 560                | 0               | 5     | 230       | 4     |     |
| 1          |             | 0                  | 0               | 5     | 250       | 4     |     |
| 1.25       |             | 0                  | 0               | 5     | 339       | 4     |     |
| 1.5        |             | 0                  | 0               | 5     | 16        | 3     |     |
| 1.75       |             | 0                  | 0               | 5     | 25        | 3     |     |
| 2          |             | 0                  | 0               | 5     | 31        | 3     |     |
| 3          |             | 0                  | 0               | 5     | 27        | 3     |     |
| 8          |             | 0                  | 0               | 5     | 177       | 3     |     |
| 15         |             | 0                  | 0               | 5     | 22        | 3     |     |
| 22         |             | 0                  | 0               | 5     | 0         | 3     |     |
| 29         |             | 0                  | 0               | 5     | 14        | 3     |     |
| 36         |             | 0                  | 0               | 5     | 16        | 3     |     |
| Patient 60 |             | 0                  | 79,840          | 11    | 3         | 1,960 | 90  |
|            |             | 0.25               | 15,320          | 0     | 3         | 1,790 | 90  |
|            | 0.5         | 400                | 0               | 3     | 980       | 80    |     |
|            | 0.75        | 0                  | 0               | 3     | 1,550     | 90    |     |
|            | 1           | 0                  | 0               | 3     | 460       | 40    |     |
|            | 1.25        | 0                  | 0               | 3     | 2,530     | 110   |     |
|            | 1.5         | 0                  | 0               | 3     | 490       | 40    |     |
|            | 1.75        | 0                  | 0               | 3     | 880       | 50    |     |
|            | 2           | 0                  | 0               | 3     | 290       | 40    |     |

(continued)



SUPPLEMENTAL TABLE 1  
Continued

| Patient ID | Time (days) | Parasites/ $\mu$ L | pLDH (pM) |       | HRP2 (pM) |       |
|------------|-------------|--------------------|-----------|-------|-----------|-------|
|            |             |                    | Average   | Error | Average   | Error |
| Patient 61 | 3           | 0                  | 0         | 3     | 1,050     | 50    |
|            | 17          | 0                  | 0         | 3     | 19        | 7     |
|            | 23          | 0                  | 0         | 3     | 12        | 7     |
|            | 30          | 0                  | 0         | 3     | 0         | 7     |
|            | 37          | 0                  | 0         | 3     | 0         | 7     |
|            | 44          | 0                  | 0         | 3     | 15        | 7     |
|            | 0           | 3,035              | 6,400     | 300   | 89,000    | 5,000 |
|            | 0.25        | 503                | 1,510     | 100   | 23,700    | 1,300 |
|            | 0.5         | 269                | 360       | 60    | 4,600     | 200   |
|            | 0.75        | 6                  | 11        | 3     | 2,400     | 100   |
|            | 1           | 0                  | 0         | 3     | 2,420     | 90    |
|            | 1.25        | 0                  | 0         | 3     | 1,390     | 60    |
|            | 1.5         | 0                  | 0         | 3     | 1,010     | 50    |
|            | 1.75        | 0                  | 0         | 3     | 1,050     | 50    |
|            | 2           | 0                  | 0         | 3     | 750       | 40    |
|            | 3           | 0                  | 0         | 3     | 590       | 40    |
|            | 9           | 0                  | 0         | 3     | 18        | 7     |
|            | 16          | 0                  | 0         | 3     | 0         | 7     |
|            | 23          | 0                  | 0         | 3     | 0         | 7     |
|            | 30          | 0                  | 0         | 3     | 0         | 7     |
| 37         | 0           | 0                  | 3         | 0     | 7         |       |

HRP2 = histidine-rich protein 2; pLDH = *Plasmodium* lactate dehydrogenase.
